# Supplementary material for: Quantitative Trait Loci Mapping and Candidate Gene Analysis for Fiber Quality Traits in Upland Cotton
Source: Preprints.org preprint supplement (doi:10.20944/preprints202406.1783.v1), 2024-06-25
Supplement: Supplementary file 1 [file supplementary]

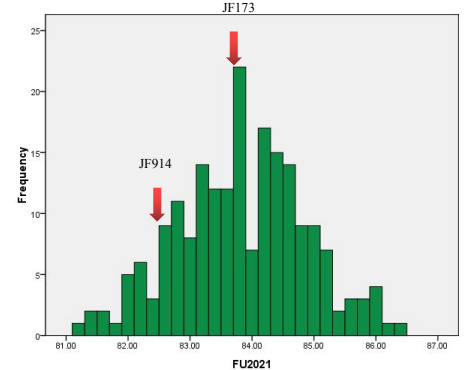

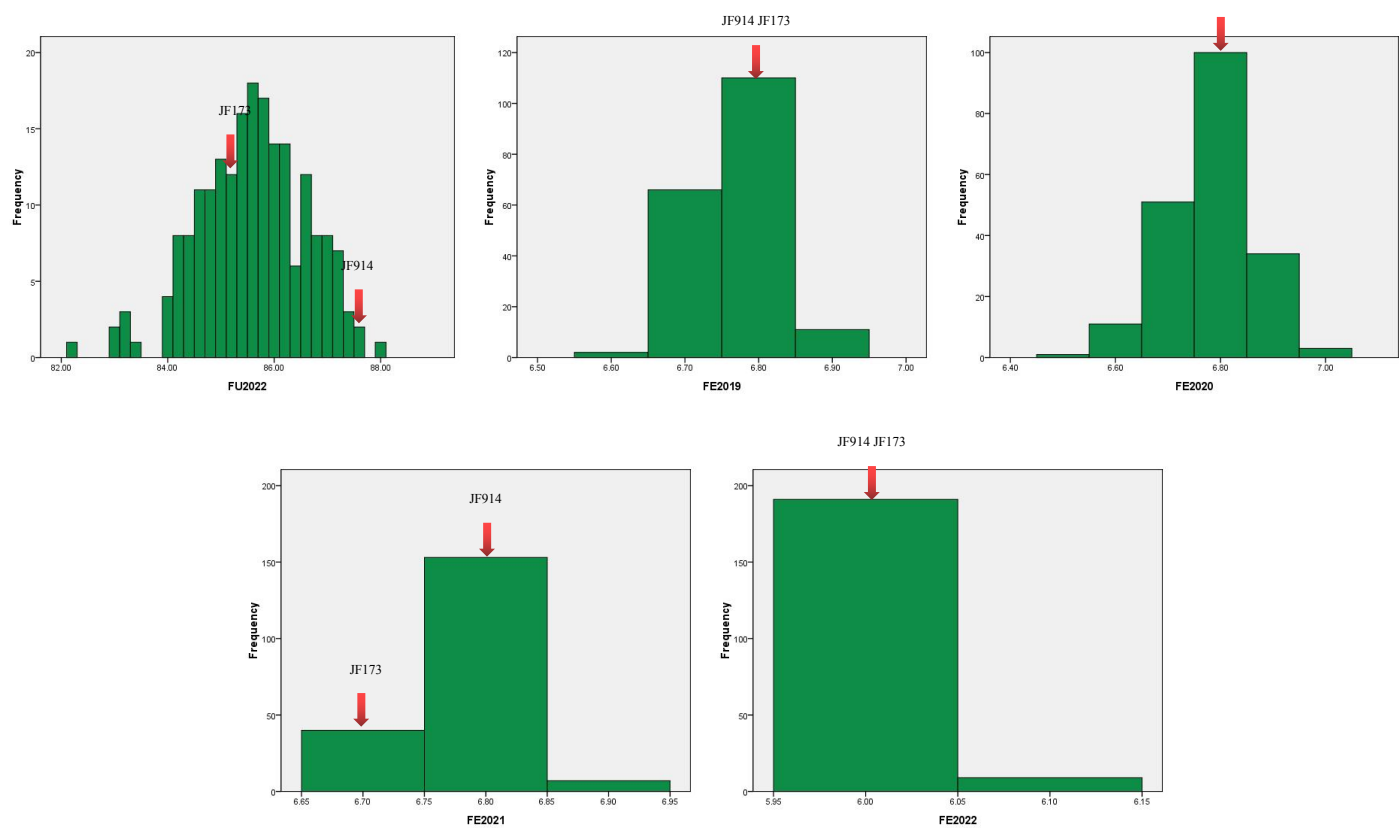

Additional file 1 Distribution of the five fiber quality traits in the 4 tested years  
 Note: JF914, Jifeng 914; JF173, Jifeng 173; FL, fiber length; FS, fiber strength; FU, fiber uniformity; MC, micronaire; FE, fiber elongation rate
