# Supplementary material for: Quantitative Trait Loci Mapping and Candidate Gene Analysis for Fiber Quality Traits in Upland Cotton
Source: Preprints.org preprint supplement (doi:10.20944/preprints202406.1783.v1), 2024-06-25
Supplement: Supplementary file 1 [file supplementary]

## Sheet: Sheet1
Additional file 8 The mapped SNPs in the qFL-D3-2 region and fiber length of the tested populations
line	Fiber length				Marker
	F2	F2:3	F2:4	F2:5	chr16_41836768	chr16_17130088	chr16_41799385	chr16_6691192	chr16_6722360	chr16_9216675	chr16_6634948	chr16_6090201
1	28.3	31.5	32.5	30.3	A	A	A	A	A	A	A	A
2	29.2	31.1	31.2	30.8	A	A	A	A	A	A	A	A
3	29.8	31.5	32.2	29.9	A	A	A	A	A	A	A	A
4	30.8	30.9	31.2	29.7	B	B	B	B	B	B	B	B
5	28.6	29.6	29.8	29.9	B	B	B	B	B	B	B	B
6	29.4	29.8	31.2	30.8	A	A	A	A	A	A	A	A
7	28.6	30.7	31.4	30.2	A	A	A	A	A	A	A	A
8	29.3	29.8	29.6	29.4	H	H	H	-	B	B	B	B
9	28.5	30.5	31	30.5	B	B	B	B	B	B	B	B
10	-	31.6	32.6	31.8	A	A	A	A	A	A	A	A
11	27.3	31.7	32.1	30.8	B	B	B	B	B	B	B	B
12	30.1	31.3	33	30.8	A	A	A	A	A	A	A	A
13	28.5	29.9	31.8	28.8	H	H	H	H	H	H	-	A
14	-	30.8	31.5	32.3	A	A	A	A	A	A	A	-
15	28.5	29.4	31.8	31.3	A	A	A	A	A	A	A	A
16	27.6	30.5	30.7	29.4	A	A	A	-	H	H	H	H
17	28.7	29.6	30.8	29.7	A	A	A	A	A	A	A	A
18	27.7	30.4	30.1	28.5	H	H	H	H	H	H	H	H
19	29.2	31.8	32	30.4	A	A	A	A	A	-	B	B
20	29.4	30.4	30.1	29.7	A	A	A	A	-	B	B	B
21	29.3	31.8	31.6	30.4	A	A	A	A	A	A	A	A
22	29.8	32.7	31.9	31.5	A	A	A	A	A	A	A	A
23	26.1	28.4	28.7	26.8	B	B	B	B	B	B	B	B
24	-	29.8	28.9	28.5	A	A	A	A	A	-	H	H
25	29.8	32.5	33.4	32.8	A	A	A	A	A	A	A	A
26	27.7	29.8	29.9	28.5	B	B	B	B	B	B	-	H
27	29.5	30.8	32	29	A	A	A	A	A	A	A	A
28	29.6	32.3	33	30.5	A	A	A	A	A	A	A	A
29	29.4	30.2	30.7	29.3	B	B	B	B	B	B	B	B
30	27.4	31.8	32.1	29.9	A	A	A	A	A	A	A	A
31	-	30.8	31.6	31.2	A	A	A	A	A	A	A	A
32	29.7	32.9	33.2	28.7	A	A	A	A	A	A	A	A
33	30.8	31.5	31.8	31	A	A	A	A	A	A	A	A
34	30.4	32.8	33	31.4	A	A	A	A	A	A	A	A
35	29.3	30.9	32.3	29.4	A	A	A	A	A	A	A	A
36	26.4	30	30	27.4	B	B	B	B	B	B	B	B
37	25.9	29.2	29.4	27.6	B	B	B	B	B	B	B	B
38	29.4	31.1	31.8	30.3	A	A	A	A	A	A	A	A
39	30.2	32.1	31.9	31.2	H	H	H	H	H	H	H	H
40	29.6	31.9	32.5	31.1	A	A	A	A	A	A	A	A
41	29.4	31.5	31.9	30.3	A	A	A	A	A	A	A	A
42	30.3	34.6	34.9	31.9	A	A	A	A	A	A	A	A
43	28.1	30.6	29.2	29.7	A	A	A	A	A	A	A	A
44	30.1	34	34.8	32.8	A	A	A	A	A	A	A	A
45	28.1	30.7	31.7	30.7	A	A	A	A	A	A	A	A
46	29.2	32	32.1	30	A	A	A	A	A	A	A	A
47	29.9	31.8	33.6	31.1	A	A	A	A	A	A	A	A
48	26	29.2	30	30.7	H	H	H	H	H	H	H	H
49	27	29.4	28.3	28.1	B	B	B	B	B	B	B	B
50	28.5	31	31.6	31.6	A	A	A	A	A	A	A	A
51	27.7	30.5	30.6	29.8	B	B	B	B	B	B	B	B
52	28.9	31	31.3	30.1	B	B	B	B	B	B	B	B
53	27.1	30.4	30.3	28.4	A	A	A	A	A	A	A	A
54	30.9	31.4	32.2	29.8	A	A	A	A	A	A	A	A
55	29.3	30.9	32.2	31	H	H	H	H	H	H	H	H
56	30.1	31.4	31.4	30.6	A	A	A	A	A	A	A	A
57	31.6	33.3	32.6	31.5	A	A	A	A	A	A	A	A
58	28.7	30.5	31.1	28.9	H	H	H	H	H	H	H	H
59	30.4	31.8	32.5	31.4	A	A	A	A	A	A	A	A
60	28.3	31.2	30.5	30.4	A	A	A	A	A	A	A	A
61	32	31.8	33.7	30.7	A	A	A	A	A	A	A	A
62	30	32	32.3	31.7	A	A	A	A	A	A	A	A
63	29.5	33.5	34.6	31.8	H	H	H	H	H	H	H	H
64	-	30	30.7	29.3	A	A	A	A	A	A	A	A
65	29.1	30.1	31.1	29.6	A	A	A	A	A	A	A	A
66	28.4	29.3	30.5	31.2	B	B	B	B	B	B	B	B
67	30.3	31.2	31.7	29.4	H	H	H	H	H	H	H	H
68	28.9	32.1	34	30.5	A	A	A	A	A	A	A	A
69	28.9	31.1	32	29.4	A	A	A	A	A	A	A	A
70	28.5	30.9	30.4	30.8	B	B	B	B	B	B	B	B
71	28.9	30.7	33	32.5	A	A	A	A	A	A	A	A
72	28.7	30.7	31.8	31.1	A	A	A	A	A	A	A	A
73	26.5	28.3	28.7	28.6	B	B	B	B	B	B	B	-
74	26.2	28	29.3	28.7	H	H	H	H	H	H	H	H
75	28.5	32.1	32	31.6	A	A	A	A	A	A	A	A
76	27.8	30.3	31.1	29.8	B	B	B	B	B	B	B	B
77	30.5	32.4	33.2	32.3	A	A	A	A	A	A	A	A
78	29.4	30.6	31.7	30.5	A	A	A	A	A	A	A	A
79	28.2	30.9	31.9	31.4	A	A	A	A	A	A	A	A
80	27.6	31.1	31.3	30	B	B	B	B	B	B	B	B
81	26.4	28.8	29.1	27.9	A	A	A	A	A	A	A	A
82	-	33.3	34	32.2	A	A	A	A	A	A	A	A
83	30.1	31.2	32.6	31.6	A	A	A	A	A	A	A	A
84	27.1	29.6	30.1	30.4	A	-	-	-	H	H	H	H
85	29.5	33.7	34.2	32.2	A	A	A	A	A	A	A	A
86	26.6	32.6	32.5	31.4	A	A	A	A	A	A	-	B
87	28.1	31.2	32.3	30.8	A	A	A	A	A	A	A	A
88	27.3	28.7	30.8	29.5	B	B	B	B	B	B	B	B
89	27.8	30.7	32.2	29.9	B	B	B	B	B	B	B	B
90	28.6	27.9	30.9	28.3	A	A	A	A	A	A	A	A
91	28.8	30.7	31.2	31.2	A	A	A	A	A	A	A	A
92	27.7	29.5	30.7	31	H	H	H	H	H	H	H	H
93	30.9	32.3	34	32.4	A	A	A	A	A	A	A	A
94	31.7	31.5	33.4	31.3	A	A	A	A	A	-	B	B
95	30	30.7	31.8	31.4	A	A	A	A	A	A	A	A
96	28.1	29.3	31	30.6	A	A	A	A	A	A	A	A
97	32.9	32.4	33.9	32.2	A	A	A	A	A	A	A	A
98	28.4	30.8	33.5	31.4	A	A	A	A	A	A	A	A
99	27.5	30.9	31	30.3	A	A	A	A	A	A	A	B
100	30.2	32.5	33.7	31.3	A	A	A	A	A	A	A	A
101	26.9	28.3	27.6	28.9	H	H	H	H	H	H	H	H
102	28.7	30.3	31.4	31.2	A	A	A	A	A	A	A	A
103	28.8	30.4	30.3	30.2	A	A	A	A	A	A	A	A
104	29.6	30.2	33.5	32.1	A	A	A	A	A	A	A	A
105	29.9	30.5	33.3	31	B	B	B	B	B	B	B	B
106	30.1	30.2	31.5	31.2	A	A	A	A	A	A	A	A
107	26.8	26.7	29.5	27.9	B	B	B	B	B	B	B	B
108	30.6	30.4	33.8	31.8	A	A	A	A	A	A	A	A
109	30	30	31.6	30.5	A	A	A	A	A	A	A	-
110	30.4	29.8	31.4	29.6	A	A	A	A	A	A	A	A
111	30.7	31.7	33.1	31.5	A	A	A	A	A	A	A	A
112	30	30.3	32.2	31.3	A	A	A	A	A	A	A	A
113	30.4	30.3	31.4	31.6	A	A	A	A	A	A	A	A
114	29.6	30.9	32.4	31.7	A	A	A	A	A	A	A	A
115	31.4	30.8	33.2	31.7	A	A	A	A	A	A	A	A
116	29.3	29.1	31.4	28.7	A	A	A	A	A	A	A	A
117	29.9	31.3	32.4	31.4	A	A	A	A	A	A	A	A
119	28.5	30	30.5	30.2	A	A	A	A	A	A	A	A
120	29.9	31.1	32.9	30.9	A	A	A	A	A	A	A	A
121	29.4	28.8	32	30	A	A	A	A	A	A	A	A
122	29	30.3	31.8	29.9	A	A	A	A	A	A	A	A
123	28.9	31.7	31	31.6	H	H	H	H	H	H	H	H
124	27.3	28.2	29.3	28.3	B	B	B	B	B	B	B	B
125	30.2	31.5	32.4	31.5	A	A	A	A	A	A	A	-
126	29.1	30.6	32.2	29	A	A	A	A	A	A	A	A
127	28.9	32.4	31.8	30.5	A	A	A	A	A	A	A	A
128	29.6	32	32.4	30	A	A	A	A	A	A	A	A
129	29.7	31.4	32	31.2	B	B	B	B	B	B	B	B
130	29.6	33	32.9	33.1	A	A	A	A	A	A	A	A
132	28	32.1	31.8	30.4	A	A	A	A	A	A	A	A
133	30.3	33.4	34.9	33	A	A	A	A	A	A	A	-
134	-	30.4	30.3	29.7	A	A	A	A	A	-	B	B
135	31	33.1	32.9	31	B	B	B	B	B	B	B	B
136	26.8	28.8	28.2	28	B	B	-	H	H	H	H	H
137	27.6	31.9	32.1	30.9	B	B	B	B	B	B	B	B
138	27.7	28.7	28.6	28.4	H	H	H	H	H	H	H	H
140	27.7	29.8	30	27.9	B	B	B	B	B	B	B	B
141	27.8	28.9	31.5	31.5	A	A	A	A	A	A	A	A
142	29.4	32.3	33.8	32.6	A	A	A	A	A	A	A	A
143	27.1	30.2	31	29.9	A	A	A	A	A	A	A	A
144	27.9	30	32	31.1	A	A	A	A	A	A	A	A
145	28.4	32.3	32.6	30.6	H	H	H	B	B	B	B	B
146	-	31	32.3	31.9	A	A	A	A	A	A	A	A
147	31.6	33.7	35.5	32.4	A	A	A	A	A	A	A	A
148	29.1	30.9	31.8	30.2	H	H	H	H	H	H	H	H
149	28.7	30.8	30.9	29.9	A	A	A	A	A	A	A	A
150	29.3	31.4	32	28.9	A	A	A	A	A	A	A	A
151	30	32	32.6	31.9	A	A	A	A	A	A	A	A
152	27	31.1	30.7	29.6	B	B	B	B	B	B	B	B
154	29.8	31.5	31.9	31.2	A	A	A	A	A	A	A	A
155	-	30.8	32.2	30.1	A	A	A	A	A	A	A	B
156	29.1	30.6	31.2	29.7	A	A	A	A	A	A	A	A
157	28.4	31.1	33.6	30.5	A	A	A	A	A	A	A	A
158	28.8	31.9	33.8	31.8	A	A	A	A	A	A	A	A
159	26.8	30	30.4	29.4	A	A	A	A	A	A	A	A
160	30.3	31.1	34	31.4	A	A	A	A	A	A	A	A
161	26.1	27.6	28.4	28.9	A	A	A	A	A	A	A	-
162	29.2	30.2	31.7	29.5	H	H	H	H	H	H	H	H
163	29.4	32.9	32.3	30.9	A	A	A	A	A	A	A	A
164	30.6	32.4	33.2	31.4	A	A	A	A	A	A	A	A
165	28.6	30.1	28.7	29.4	-	B	B	B	B	B	B	B
166	28.1	28.5	29.8	30	A	A	A	A	A	A	A	A
167	29	31.3	32	29.3	A	A	A	A	A	A	A	B
168	29.1	31	32.1	30.3	H	H	H	H	H	H	H	H
169	28.7	29.8	30.9	30.1	A	A	A	A	A	A	A	A
170	28.4	29.2	30.6	30	A	A	A	A	A	A	A	A
171	29.1	31	32.4	31	A	A	A	A	A	A	A	A
172	30.2	32.3	33.9	31.1	A	A	A	A	A	A	A	A
173	31	35.1	31.5	28.1	H	H	H	H	H	H	H	H
174	29.7	30.4	31.1	31.6	A	A	A	A	A	A	A	A
175	29.1	31.6	31.8	30.1	A	A	A	A	A	A	A	A
176	27.2	29.6	29.5	29.9	H	H	H	H	H	H	H	H
177	29.5	31.3	32.1	30.6	A	A	A	A	A	A	A	A
178	27.9	31.5	32.3	31.5	A	A	A	A	A	A	A	A
179	29.2	30.9	31.8	31.1	A	A	A	A	A	A	A	A
180	29.6	31.3	31.7	30.5	A	A	A	A	A	A	A	A
181	31	32.7	33.9	32	A	A	A	A	A	A	A	A
182	28	30.6	31	28.4	B	B	B	B	B	B	B	B
183	27.9	30.4	30.7	29.5	A	A	A	A	A	A	A	A
184	28.8	32.1	33	30.5	A	A	A	A	A	A	A	A
185	29.7	33	33.2	30.8	A	A	A	A	A	A	A	A
186	29.2	30.4	30.8	29.4	A	A	A	A	A	A	A	A
187	31	31.6	31.5	30.2	A	A	A	A	A	A	A	A
188	27.7	30.8	30.9	29.6	H	H	H	H	H	H	H	H
189	27.1	30.9	29.5	27.7	B	B	B	B	B	B	-	H
190	28.6	29.8	30.7	29.2	B	B	B	B	B	B	B	B
191	-	31.8	31.7	31	H	-	B	B	B	B	B	B
192	27.4	30.6	30.1	29.1	A	A	A	A	A	A	A	-
193	27.3	29.1	31	29.1	A	A	A	A	A	A	A	A
194	31	34	33.3	32.4	A	A	A	A	A	A	A	A
195	28.7	33.4	33.6	32	A	A	A	A	A	A	A	A
196	29.8	32.4	33.4	31.6	A	A	A	A	A	A	A	A
197	29.2	32.4	32.5	30.3	H	H	H	H	H	H	H	H
198	-	31.7	31.6	30.2	A	A	A	A	A	A	H	H
199	29.3	31.6	31.7	30	A	A	A	A	A	A	A	A
200	29	30.8	31.4	29.9	A	A	A	A	A	A	A	A
201	26	29	28	26.8	B	B	B	B	B	B	B	B
202	27.4	30.1	28.3	28.2	A	A	A	A	A	A	A	A
203	31.9	33	32.7	31.2	A	A	A	A	A	A	A	A
204	31.4	32.1	32.1	31.5	H	H	H	H	H	H	H	H
			FL2021
			35.5
			27.6
			31.676
			0.176186
			-0.264875
			4.61121
			1.46065
			最小值
			27.6
			28.2
			81.2
			3.7
			6.7
			4.33
			32.9952
			9.7
